# Supplementary material for: Concentration evaluation and risk assessment of pesticide residues in selected vegetables sold in major markets of Port Harcourt South-South Nigeria
Source: publisher site journal article supplement (doi:10.1515/psr-2022-0317), 2023-02-28
Supplement: Supplementary file 1 [file j_psr-2022-0317_suppl.docx]

APPENDIX

|  | Organochlorine Pesticide MS Chromatogram for Carrot | Organophosphate Pesticide MS Chromatogram for Carrot |
| --- | --- | --- |
| 1 | 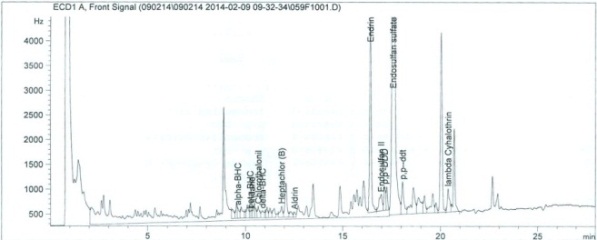 | 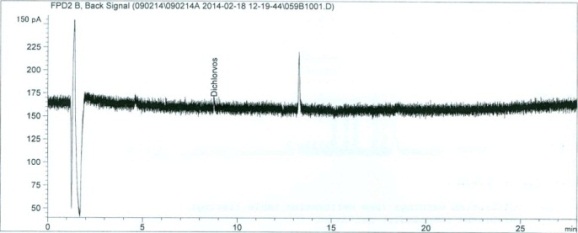 |
| 2 | 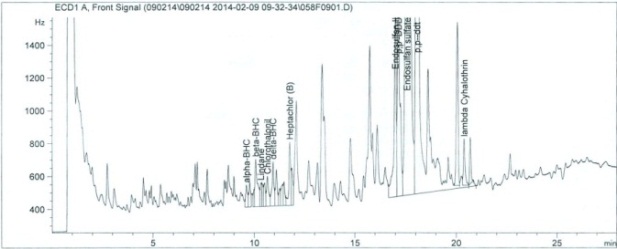 | 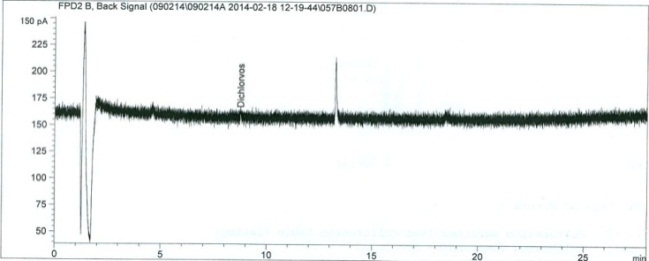 |
| 3 | 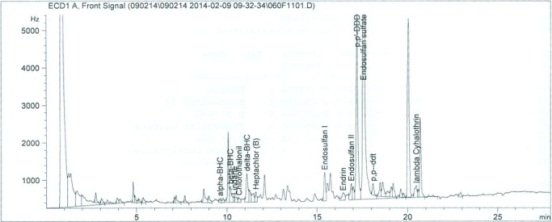 | 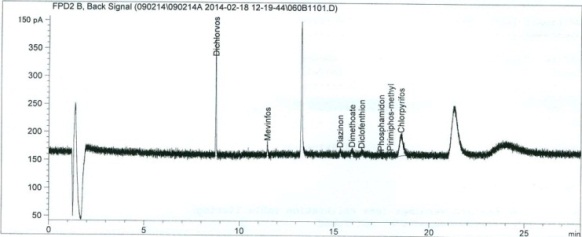 |

|  | Organochlorine Pesticide MS Chromatogram for Cabbage | Organophosphate Pesticide MS Chromatogram for Cabbage |
| --- | --- | --- |
| 1 | 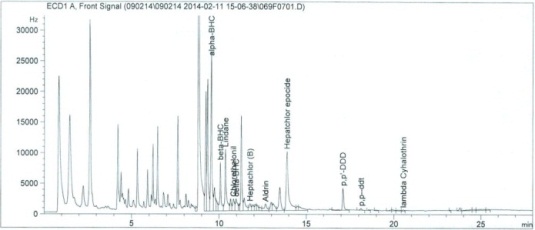 | 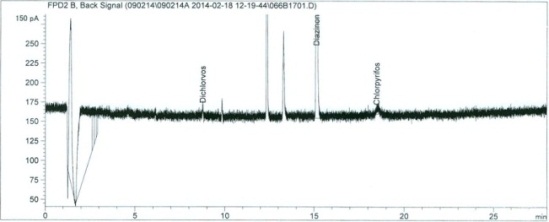 |
| 2 | 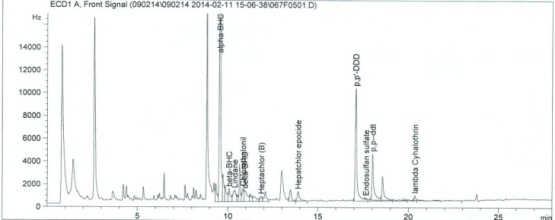 | 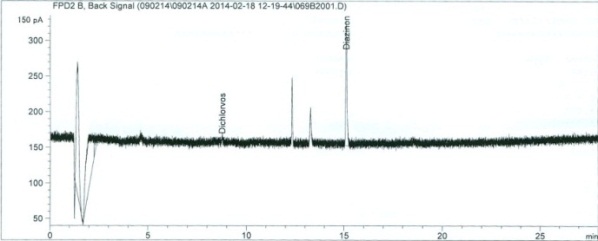 |
| 3 | 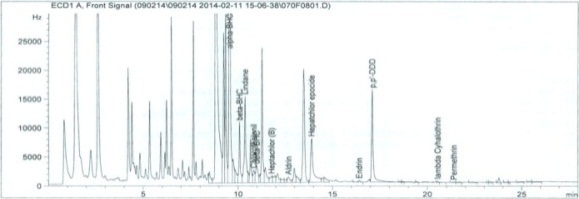 | 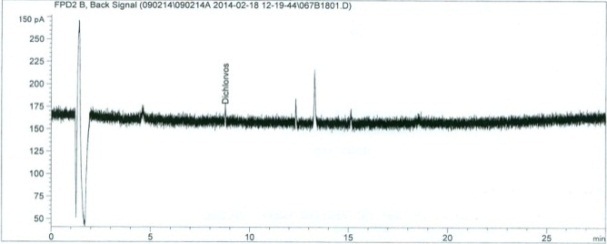 |

|  | Organochlorine Pesticide MS Chromatogram for Cucumber | Organophosphate Pesticide MS Chromatogram for Cucumber |
| --- | --- | --- |
| 1 | 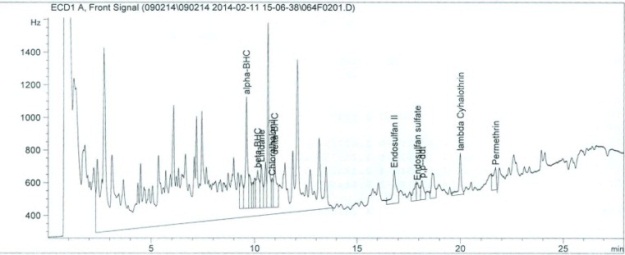 | 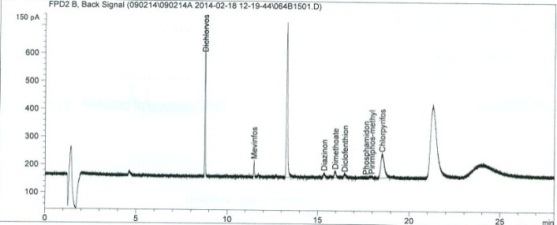 |
| 2 | 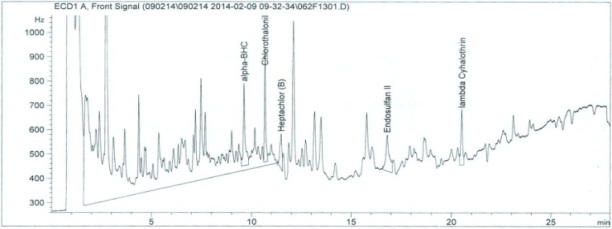 | 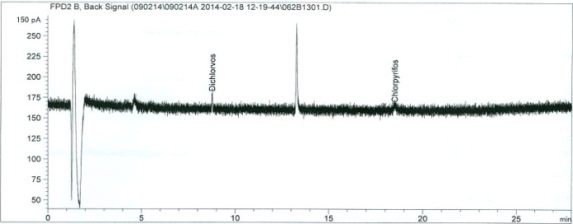 |
| 3 | 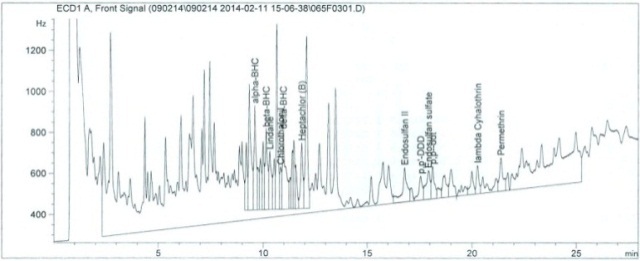 | 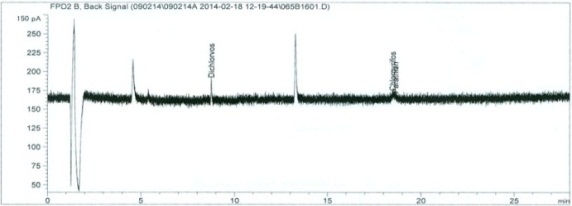 |

|  | Organochlorine Pesticide MS Chromatogram for Eggplant | Organophosphate Pesticide MS Chromatogram for Eggplant |
| --- | --- | --- |
| 1 | 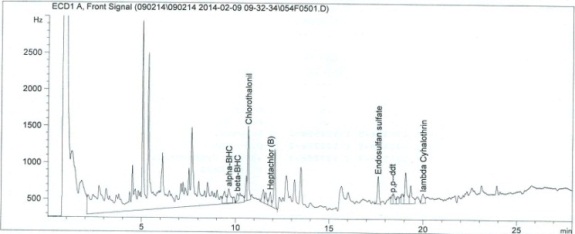 | 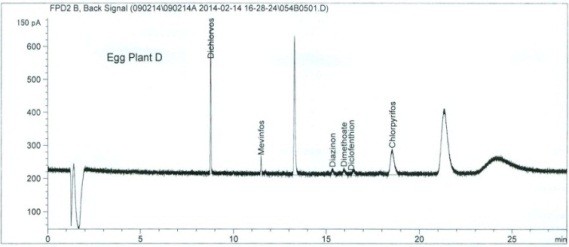 |
| 2 | 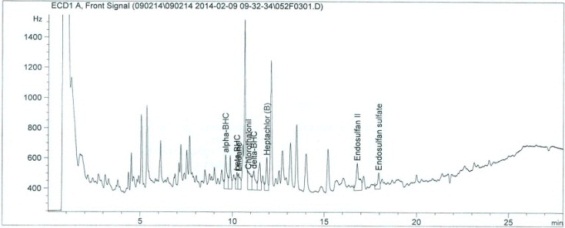 | 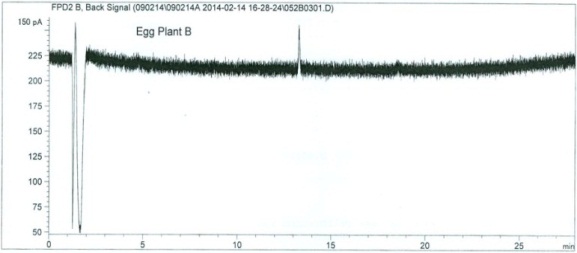 |
| 3 | 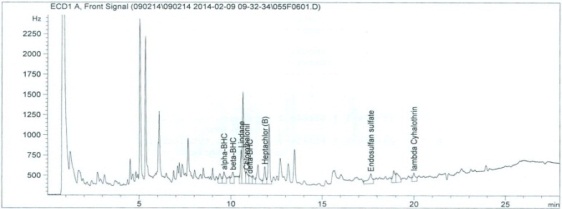 | 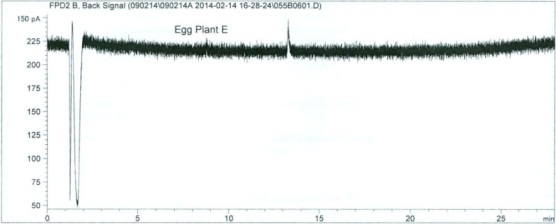 |
